# Supplementary material
Source: PubMed Central journal article supplement (PMC2644145)
Supplement: 0809575106_0809575106SI.pdf [file 0809575106_0809575106SI.pdf]

# Supporting Information

## Martinez *et al.* 10.1073/pnas.0809575106

1. Perez-Boada M, *et al.* (2005) Versatile peroxidase oxidation of high redox potential aromatic compounds: Site-directed mutagenesis, spectroscopic and crystallographic investigation of three long-range electron transfer pathways. *J Mol Biol* 354(2):385–402.
2. Ruiz-Duenas FJ, *et al.* (2007) Manganese oxidation site in *Pleurotus eryngii* versatile peroxidase: a site-directed mutagenesis, kinetic, and crystallographic study. *Biochemistry* 46(1):66–77.
3. Thompson JD, Gibson TJ, Plewniak F, Jeanmougin F, Higgins DG (1997) The CLUSTAL\_X windows interface: flexible strategies for multiple sequence alignment aided by quality analysis tools. *Nucleic Acids Res* 25(24):4876–4882.
4. Kumar S, Tamura K, Jakobsen IB, Nei M (2001) MEGA2: Molecular evolutionary genetics analysis software. *Bioinformatics* 17(12):1244–1245.
5. Gustin MC, Albertyn J, Alexander M, Davenport K (1998) MAP kinase pathways in the yeast *Saccharomyces cerevisiae*. *Microbiol Mol Biol Rev* 62(4):1264–1300.

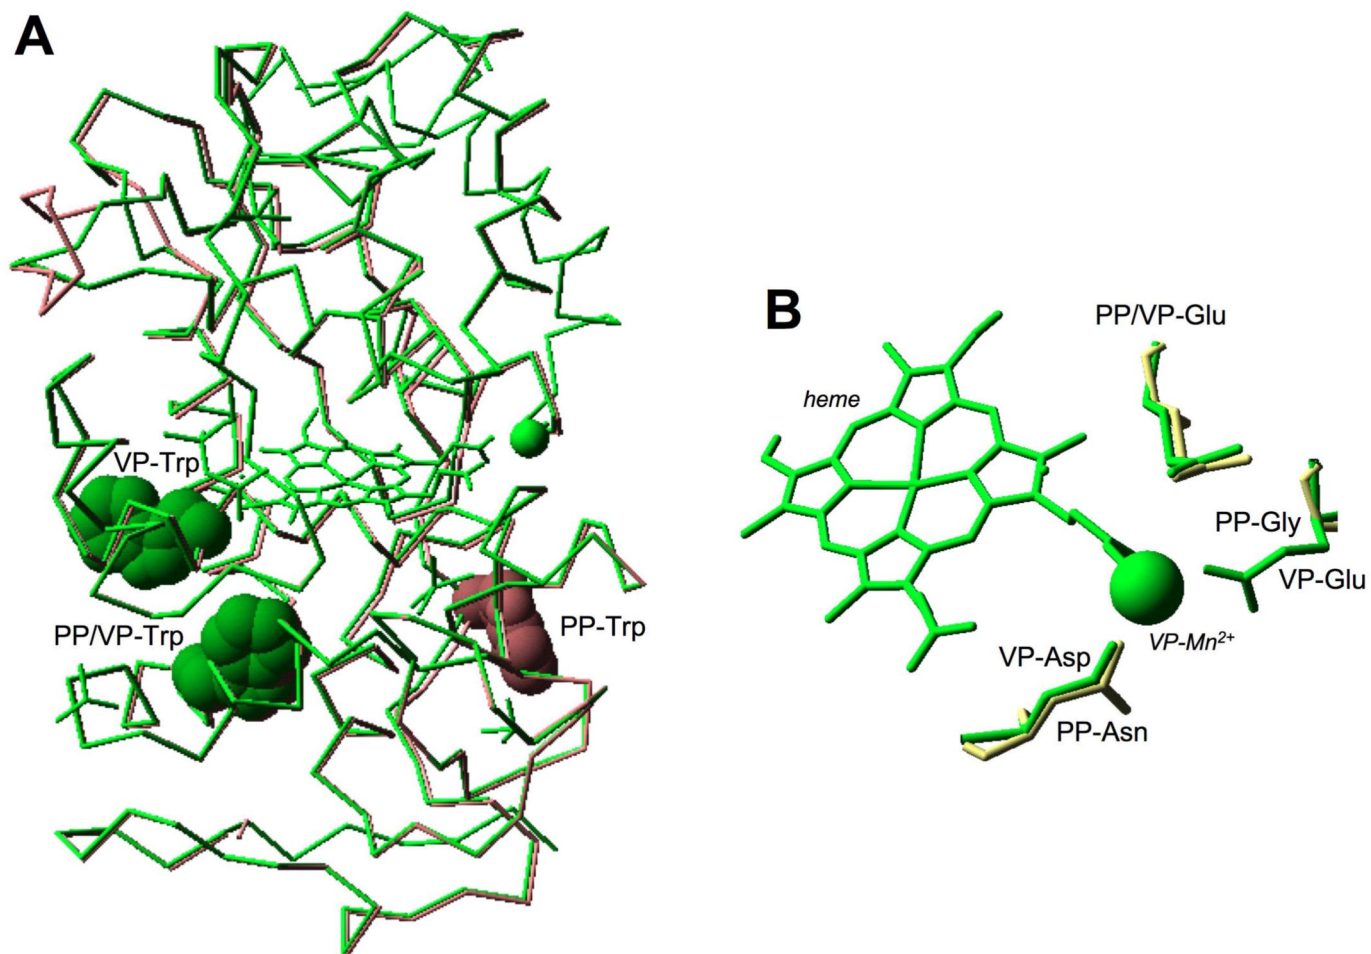

**Fig. S1.** 3D-model for the hypothetical *Postia placenta* peroxidase Ppl44056 (PP, light brown) obtained by homology modeling, superimposed with the crystal structure of versatile peroxidase (VP) from *Pleurotus eryngii* (green). (A) Protein backbones indicating the position of tryptophan residues present in these peroxidases (as van der Waals spheres), one of them being common to both proteins (Middle) whereas the two others are characteristic of VP (Left) and PP (Right). The position of heme cofactor in a central pocket is also indicated. (B) Detail of the propionates side of the heme pocket where the Mn-oxidation site is located in VP formed by 2 glutamate and 1 aspartate residues (2 of them being substituted by Asn and Gly residues in PP). From A it is possible to conclude that *P. placenta* PP lacks the catalytic tryptophan responsible for oxidation of high redox-potential aromatic substrates by *P. eryngii* VP (and *Phanerochaete chrysosporium* lignin peroxidase) (1), located near the heme cofactor at the Left side of the figure. From B it is possible to conclude that *P. placenta* PP lacks a Mn-oxidation site near the internal propionate of heme as found in *P. eryngii* VP (and *P. chrysosporium* Mn-peroxidase) crystal structure (2). This structural comparison and the corresponding sequence alignments indicate that the *P. placenta* peroxidase is not a ligninolytic peroxidase (as LiP, MnP, or VP) but more closely allied to *Coprinopsis cinerea* peroxidase (CIP) and could oxidize low redox-potential dyes and phenols at the edge of the main heme access channel.

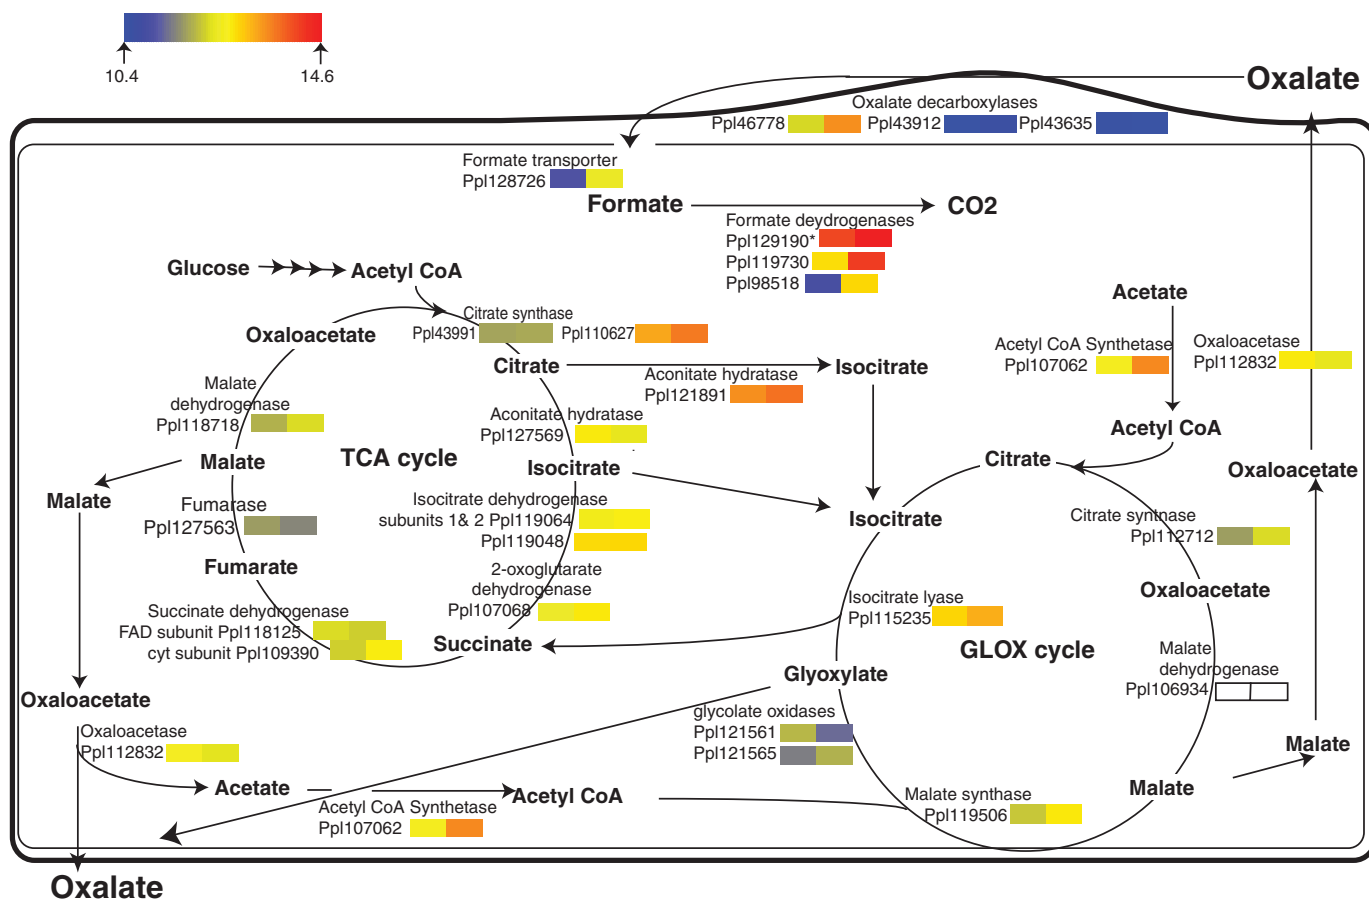

**Fig. S2.** Putative components of TCA cycle, GLOX cycle, and oxalate metabolism. Colored bars indicate microarray-derived expression results from glucose-grown (*Left*) and cellulose-grown (*Right*) mycelia. Manual inspection of malate dehydrogenase model Ppl106934 revealed several inaccuracies upon which microarray 60mers were based. Reliable expression results are therefore not available. Model details and microarray results are listed under GEO accession no. GSE12540 si\_table\_8.xls.

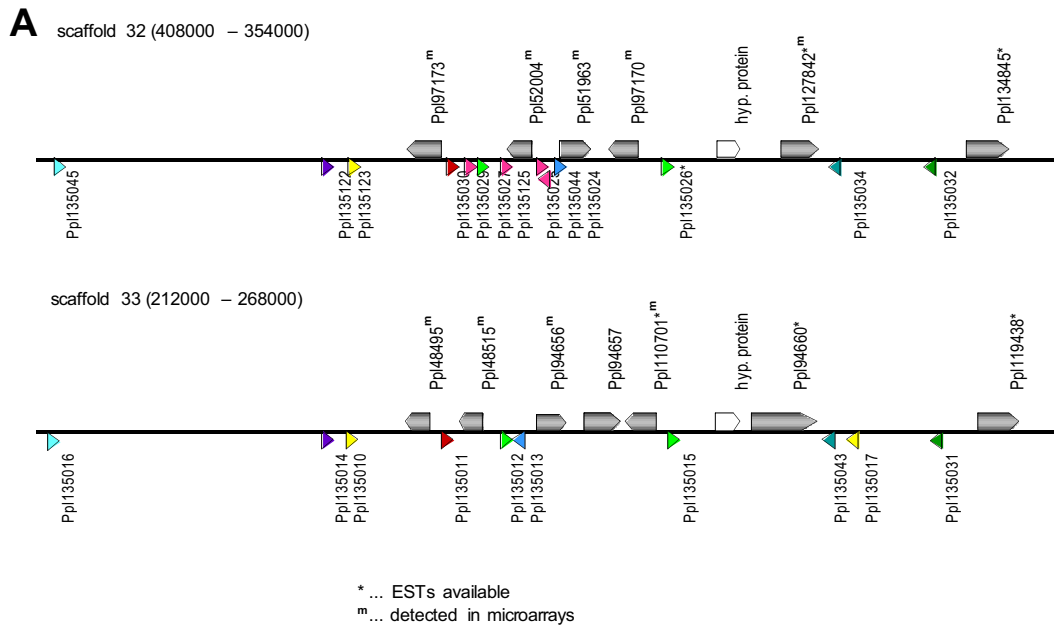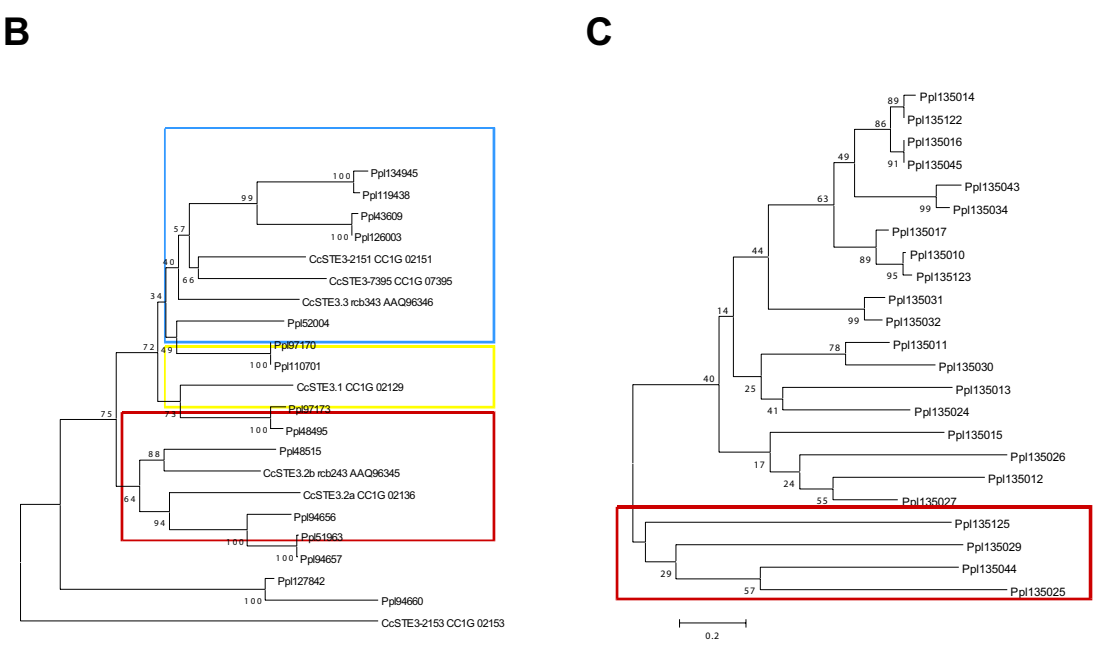

**Fig. S3.** Analysis of *P. placenta* B-mating locus. **A:** Schematic representation of the B-mating type locus. Clusters and groups within clusters are given according to the phylogenetic proximity of the respective gene models to their orthologs in *C. cinerea*. Closely related pheromone precursors (as revealed by phylogenetic analysis, **C**) are depicted in identical colors and those lacking close neighbors are shown in black. Complete microarray results are listed in GEO accession no. GSE12540, where Ppl94656 and Ppl51963 are represented by earlier incomplete models Ppl32692 and Ppl32709, respectively. (Oligonucleotide specificity is retained in the improved models.) **B:** Phylogenetic analysis of G protein coupled receptors and their orthologs in *C. cinerea*. Sequences used are derived from the *C. cinerea* strain Okayama 7 genome ([http://www.broad.mit.edu/annotation/genome/coprinus\\_cinereus/Home.html](http://www.broad.mit.edu/annotation/genome/coprinus_cinereus/Home.html)). These sequences are: CC1G\_02129 = CcSTE3.1, CC1G\_02136 = CcSTE3.2b and CcSTE3.2a (previously known as Rcb2 B43, AAQ96345), CC1G\_02137 = CcSTE3.3 (previously known as Rcb3 B43; AAQ96346), CC1G\_02151 = CcSTE3-2151, CC1G\_02153 = CcSTE3-2153, and CC1G\_07395 = CcSTE3-7395. **C:** Phylogenetic analysis of putative a-type peptide pheromone precursors of *P. placenta*. For both trees, sequence alignments were performed by using ClustalX (1.81) (3) and the alignments were manually adjusted by the aid of Genedoc. Phylogenetic analysis was performed with MEGA 4.0 (4) by using the minimum evolution approach. The reliability of the nodes was estimated by minimum evolution bootstrap percentages obtained after 1000 pseudoreplications.

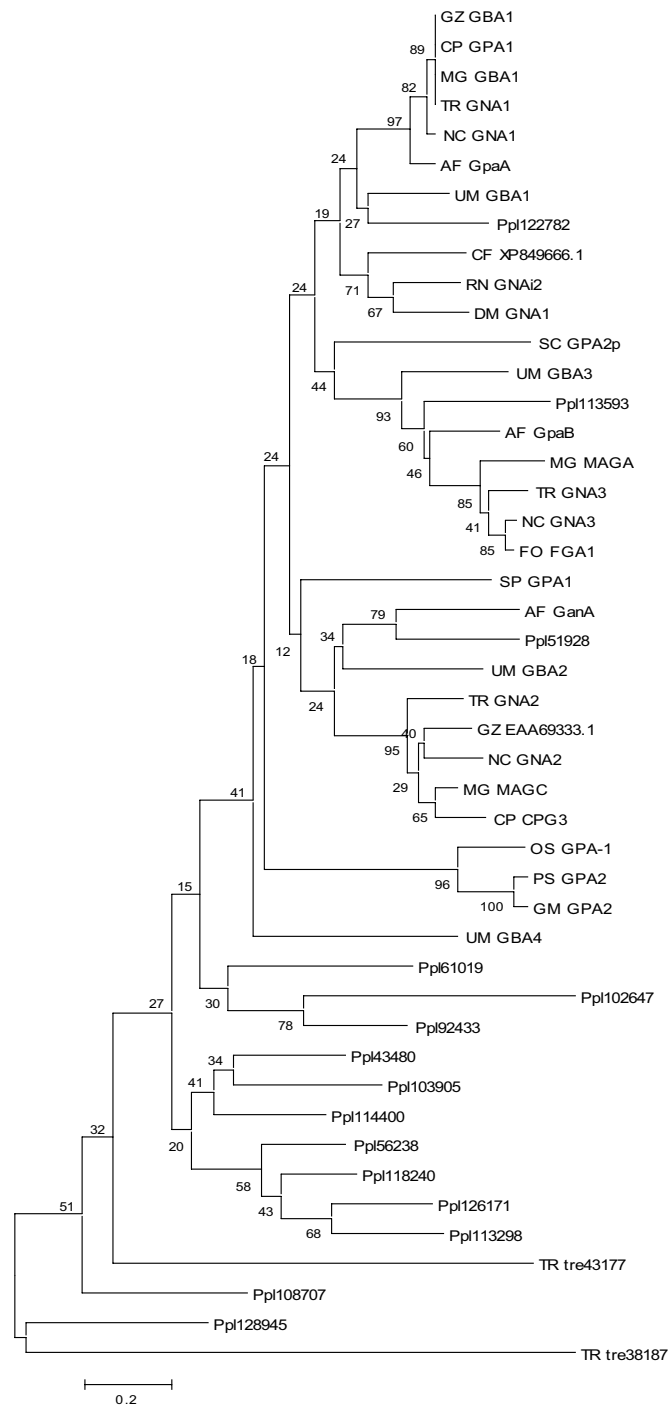

**Fig. S4.** Phylogenetic analysis of G protein  $\alpha$  subunits. The analysis was performed as described with Fig. S3 *Trichoderma reesei* (*Hypocrea jecoring*) (TR), *Saccharomyces cerevisiae* (SC), *Schizosaccharomyces pombe* (SP), *Neurospora crassa* (NC), *Aspergillus fumigatus* (AF), *Gibberella zeae* (GZ), *Fusarium oxysporum* (FO), *Magnaporthe grisea* (MG), *Cryphonectria parasitica* (CP), *Rattus norvegicus* (RN), *Canis familiaris* (CF), *Drosophila melanogaster* (DM), *Oryza sativa* (OS), *Pisum sativum* (PS), *Glycine max* (GM), and *Ustilago maydis* (UM).

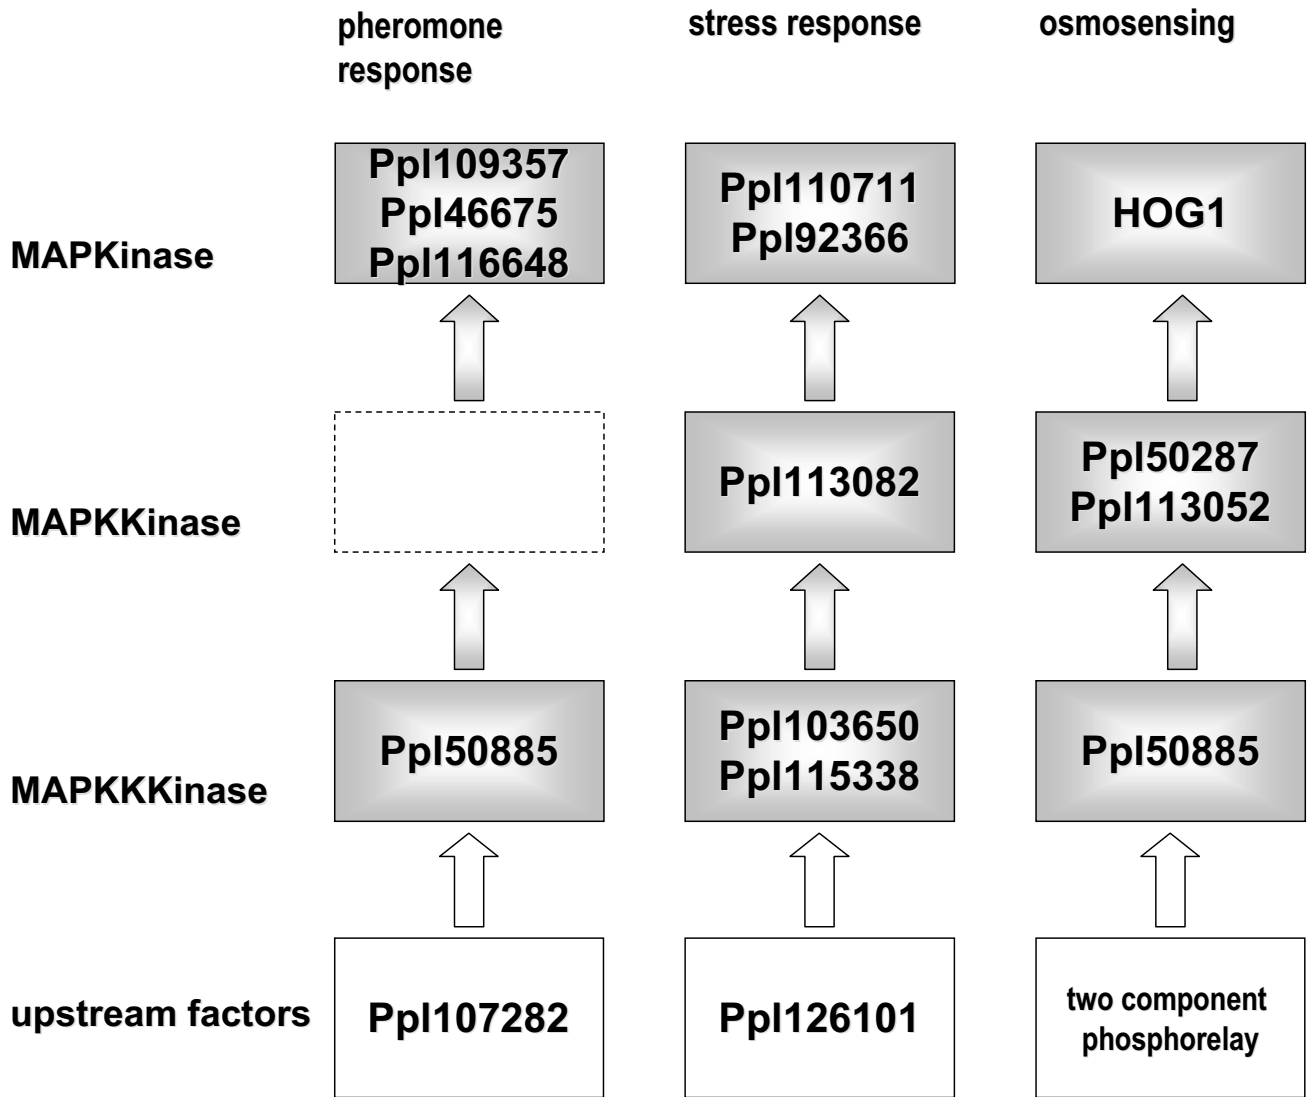

Fig. S5. Schematic representation of putative MAP-kinase pathways in *P. placenta*. Cascades and upstream factors were deduced from Gustin *et al.* (5) and similarity of the respective *P. placenta* predicted proteins as suggested by BLASTP-searches restricted to *Saccharomyces cerevisiae*.

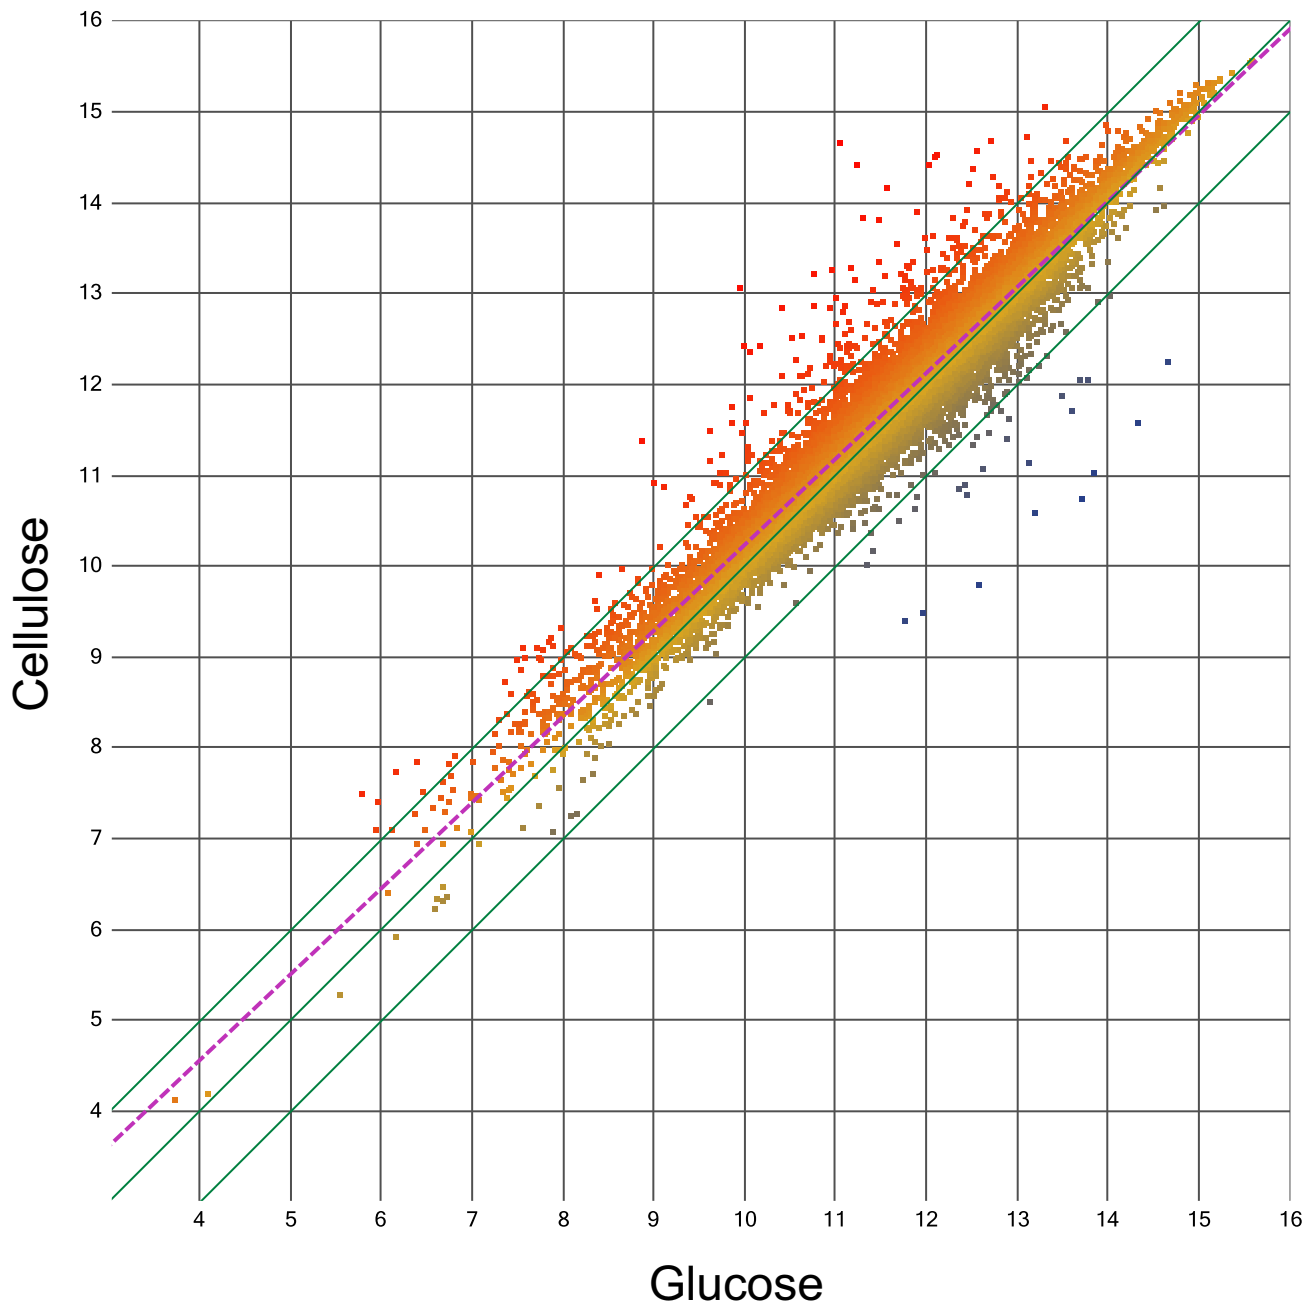

**Fig. S6.** Scatter plot showing expression of 12,438 *P. placenta* genes in cultures containing glucose or microcrystalline cellulose as sole carbon source. Data normalized and shown as  $\log_2$  scale. Middle solid green line is identity ( $x = y$ ). Outside green lines delineate 290 genes with  $>2$ -fold change in intensity in one dataset. Details for these regulated genes appear in `si_table_3.xls` under GEO accession no. GSE12540. Dashed purple line is best fit linear regression. Values for all genes, together with ANOVA results are listed under GEO accession no. GSE12540.

**Table S1. Distribution of putative CAZyme modules in sequenced fungal genomes**

| Species                 | GH  | GH5 | GH5 (CBM1) | GH6 | GH7 | GH10 | GH11 | GH12 | GH43 | GH51 | GH61 | GT  | CBM | CBM1 | CE | PL | EXPN |
|-------------------------|-----|-----|------------|-----|-----|------|------|------|------|------|------|-----|-----|------|----|----|------|
| <i>M. oryzae</i>        | 231 | 13  | 1          | 3   | 6   | 5    | 5    | 3    | 19   | 3    | 17   | 92  | 60  | 21   | 47 | 1  | 1    |
| <i>G. zeae</i>          | 243 | 15  | 1          | 1   | 2   | 5    | 3    | 2    | 16   | 2    | 13   | 102 | 61  | 12   | 42 | 20 | 5    |
| <i>T. reesei</i>        | 192 | 11  | 2          | 1   | 2   | 1    | 4    | 1    | 2    | 0    | 3    | 87  | 35  | 14   | 15 | 3  | 4    |
| <i>C. neoformans</i>    | 75  | 12  | 0          | 0   | 0   | 0    | 0    | 0    | 0    | 1    | 1    | 68  | 10  | 0    | 9  | 3  | 1    |
| <i>U. maydis</i>        | 98  | 12  | 0          | 0   | 0   | 2    | 1    | 0    | 4    | 2    | 0    | 64  | 9   | 0    | 19 | 1  | 8    |
| <i>L. bicolor</i>       | 163 | 22  | 1          | 0   | 0   | 0    | 0    | 3    | 0    | 0    | 8    | 88  | 26  | 1    | 19 | 7  | 12   |
| <i>P. chrysosporium</i> | 180 | 20  | 4          | 1   | 8   | 6    | 1    | 2    | 4    | 2    | 13   | 68  | 45  | 30   | 19 | 4  | 11   |
| <i>C. cinereus</i>      | 211 | 27  | 1          | 5   | 7   | 5    | 6    | 1    | 4    | 1    | 33   | 72  | 89  | 46   | 51 | 13 | 14   |
| <i>P. placenta</i>      | 144 | 20  | 0          | 0   | 0   | 3    | 0    | 2    | 1    | 1    | 2    | 75  | 6   | 0    | 10 | 6  | 7    |

As defined by Henrissat and coworkers (<http://afmb.cnrs.mrs.fr/CAZY/index.html>). Family 1 carbohydrate binding modules confer cellulose binding. GH, total number glycoside hydrolase modules; GH#, modules within individual glycoside hydrolase families; GH5 (CBM1), glycoside hydrolase family 5 modules associated with family 1 carbohydrate binding module; GT, glycosyl transferase modules; CBM, carbohydrate binding modules; CBM1, family 1 carbohydrate binding modules; CE, carbohydrate esterases; PL, polysaccharide lyases; EXPN, expansins.



Table S2. Extracellular CAZY peptides sequenced by LC-MS/MS

| Alleles*               | Description                             | ESTs <sup>†</sup><br>Total/Avicel | Microarray <sup>‡</sup> |             | LC-MS/MS peptides <sup>§</sup><br>total/unique/score |          |           |
|------------------------|-----------------------------------------|-----------------------------------|-------------------------|-------------|------------------------------------------------------|----------|-----------|
|                        |                                         |                                   | P value                 | Fold change | Aspen                                                | Avicel   | Cotton    |
| 88470/90501            | GH not yet assigned to family           | 0                                 | 2.24E-7                 | 2.24        | 1/1/46                                               | –        | –         |
| 105534/none            | GH10 xylanase                           | 9/0                               | 1.93E-11                | 3.69        | 5/4/299                                              | –        | –         |
| 113670/134787 (90657)  | GH10 xylanase                           | 2/2                               | 1.84E-6                 | 1.45        | 2/2/90                                               | –        | –         |
| 113112/117345          | GH15 glucoamylase                       | 2/1                               | 9.25E-10                | 2.28        | 6/4/390                                              | –        | –         |
| 112941/61809           | GH16 endo-1,3- $\beta$ -glucanase       | 5/4                               | 1.98E-12                | 3.95        | –                                                    | 2/1/181  | 2/1/141   |
| 124498/126595          | GH18 chitinase                          | 16/8                              | 1.50E-8                 | 1.97        | 1/1/79                                               | –        | –         |
| 119525/120960          | GH18 chitinase                          | 38/12                             | 2.45E-6                 | 1.35        | 1/1/44                                               | –        | –         |
| 56576/57564            | GH2 $\beta$ -mannosidase                | 0                                 | 0.0093                  | 1.074       | 1/1/49                                               | –        | –         |
| 130398/134907 (134894) | GH20 $\beta$ -hexosaminidase            | 2/0                               | 0.0063                  | –1.20       | 4/2/227                                              | –        | –         |
| 128150/98662           | GH27 $\alpha$ -galactosidase            | 2/2                               | 0.00023                 | 1.27        | 3/2/198*                                             | –        | –         |
| 107557/none            | GH3 $\beta$ -glucosidase                | 3/3                               | 0.00014                 | 1.15        | 12/5/803                                             | 5/3/385  | 2/1/144   |
| 127469/51213           | GH3 $\beta$ -xylosidase                 | 6/2                               | 8.75E-6                 | 1.18        | 7/5/382                                              | –        | –         |
| 135050/45962 (122151)  | GH30                                    | 12/3                              | 1.46E-9                 | 2.30        | 1/1/46                                               | –        | –         |
| 60599/93878 (134924)   | GH31 $\alpha$ -glucosidase (maltase)    | 0                                 | 0.00003                 | 1.16        | 4/3/241                                              | –        | –         |
| 127993/128101          | GH35 $\beta$ -galactosidase             | 12/2                              | 0.00007                 | 1.23        | 5/4/264                                              | 3/2/155* | 1/1/48    |
| 61292/none             | GH37 trehalase                          | 1/0                               | 0.000182                | 1.14        | 4/3/237                                              | –        | –         |
| 97540/115929           | GH37 trehalase                          | 7/2                               | 0.0086                  | 1.06        | –                                                    | 2/2/95   | 1/1/49    |
| 115593/134925          | GH47 $\alpha$ -mannosidase              | 1/1                               | 2.94E-7                 | –1.89       | 3/3/149                                              | –        | –         |
| 121831/134772 (57321)  | GH5 endo- $\beta$ -1,4-mannosidase      | 6/6                               | 4.13E-9                 | 1.93        | 7/2/551                                              | –        | –         |
| 115648/108962          | GH5 endo- $\beta$ -1,4-endoglucanase    | 6/4                               | 7.80E-7                 | 1.43        | 4/3/232                                              | –        | –         |
| 127046/100251          | GH51 ( $\alpha$ -arabinofuranosidase)   | 8/0                               | 0.0082                  | 1.10        | 3/1/239*                                             | 2/1/134  | 5/1/491*  |
| 119394/105490          | GH55 1,3-glucanase                      | 4/4                               | 2.14E-12                | 5.38        | 18/6/1233                                            | 4/2/393* | 6/3/487   |
| 108648/116267          | GH55 1,3-glucanase                      | 16/14                             | 2.07E-11                | 3.15        | 14/5/1103                                            | 2/2/203* | 13/3/1053 |
| 117860/118950          | GH72 $\beta$ -1,3-glucanosyltransferase | 50/17                             | 2.00E-6                 | 1.37        | 1/1/64                                               | –        | –         |
| 126692/111332          | GH79 endo- $\beta$ -glucuronidase       | 3/3                               | 2.06E-7                 | 1.86        | 7/4/461                                              | –        | –         |
| 112047/116992          | GH92 $\alpha$ -1,2-mannosidase          | 4/4                               | 0.0052                  | –1.15       | 3/2/198                                              | –        | 2/1/148   |

\*Protein model identification number. Underlined model number selected as microarray target. Alternative models shown parenthetically.

<sup>†</sup>Total number of ESTs derived from all media/number of ESTs from medium with microcrystalline cellulose (Avicel) as sole carbon source.

<sup>‡</sup>Expression ratios derived from comparisons of glucose-grown versus cellulose-grown mycelia. Analysis of variance *P* values based on 3 full biological replicates per culture medium. Quantile normalization and robust multi-array averaging (RMA) applied to entire dataset. Reciprocals of ratios < 1.0 are multiplied by –1.

<sup>§</sup>Total soluble extracellular protein fractionated and analyzed by one-dimensional SDS-PAGE and LC-MS/MS. Total number of peptides/number of unique peptides/Mascot score. Asterisks indicate identification of all allele-specific peptide sequences, all of which are listed with scoring in si\_table\_11.xls under GEO accession 12540.

**Table S3. Summary of oxidoreductases potentially involved in lignocellulose degradation by *P. placenta* (Ppl) and *P. chrysosporium* (Pch)**

| Putative function                     | EC class  | Ppl             | Pch             | Gene; ref.         |
|---------------------------------------|-----------|-----------------|-----------------|--------------------|
| <b>Peroxide generation</b>            |           |                 |                 |                    |
| Methanol oxidase                      | 1.1.3.13  | 1*              | 1               | <i>mox1</i> ; (25) |
| Aryl alcohol oxidase                  | 1.1.3.7   | 3               | 3               | <i>aox</i> ; (28)  |
| Glucose oxidase                       | 1.1.3.14  | ≥5 <sup>†</sup> | ≥4 <sup>†</sup> | <i>gox</i> ; (29)  |
| Pyranose-2-oxidase                    | 1.1.3.10  | 0               | 1               | <i>pox1</i> ; (30) |
| Copper radical oxidase                | –         | 3* <sup>†</sup> | 5*              | <i>cro</i> ; (33)  |
| <b>Iron reduction and homeostasis</b> |           |                 |                 |                    |
| Quinone reductase                     | 1.6.5.5   | 1*              | 4               | <i>qrd</i> ; (37)  |
| Glycoprotein iron reductase           | –         | 4*              | 2               | <i>glp</i> ; (40)  |
| Cellobiose dehydrogenase              | 1.1.99.18 | 0               | 1 <sup>†</sup>  | <i>cdh1</i> ; (37) |
| Iron ferroxidase                      | 1.16.3.1  | 1*              | 1               | <i>fet1</i> ; (48) |
| <b>Ligin modification</b>             |           |                 |                 |                    |
| Lignin peroxidase                     | 1.11.1.13 | 0               | 10              | <i>lip</i> ; (37)  |
| Manganese peroxidase                  | 1.11.1.16 | 0               | 5               | <i>mnp</i> ; (37)  |
| Low redox peroxidase                  | 1.11.1.7  | 1               | 1               | <i>lrp1</i> ; (44) |
| Chloroperoxidase                      | 1.11.1.10 | 5*              | 3               | <i>cpo</i> ; (43)  |
| Laccase                               | 1.10.3.2  | 3*              | 0               | <i>lac</i> ; (48)  |

Detailed information on all genes in *si\_table\_6.xls* and *si\_table\_7.xls* under GEO accession 12540.

\*Gene, or member(s) of the gene family, with significant ( $P < 0.01$ ;  $>2$ -fold) transcript accumulation in cultures of *P. placenta* containing microcrystalline cellulose as sole carbon source relative to glucose-grown cultures. (Comparable microarray data not available for *P. chrysosporium*.)

<sup>†</sup>Peptides identified in culture supernatants by LC-MS/MS (*si\_table\_11.xls* under GEO accession 12540).

## Other Supporting Information Files

[SI Appendix](#)
